# Supplementary material
Source: PubMed Central journal article supplement (PMC3186435)
Supplement: supp_M111.233502_jbc.M111.233502-1.pdf [file supp_M111.233502_jbc.M111.233502-1.pdf]

Supplemental Table 1. List of genes upregulated by active ATF6

| Gene                                                                                  | Gene symbol | NCBI Accession | Fold increase | % GAPDH |
|---------------------------------------------------------------------------------------|-------------|----------------|---------------|---------|
| <b>ATF6-inducible genes (assayed for apoptosis induction)</b>                         |             |                |               |         |
| Arachidonate lipoxygenase 3                                                           | Aloxe3      | gb:NM_011786.1 | 11.8          | 2.6     |
| Cysteine-rich with EGF-like domain 2                                                  | Creld2      | gb:AK017880.1  | 3.8           | 37.6    |
| Sell (suppressor of lin-12) 1 homolog (C. elegans)                                    | SEL1L       | gb:AK005023.1  | 3.3           | 8.1     |
| transmembrane protein 50B                                                             | Tmem50B     | gb:BC004841.1  | 2.7           | 3.9     |
| programmed cell death 4                                                               | Pdcd4       | gb:AI642124    | 2.1           | 5.0     |
| arginine-rich, mutated in early stage tumors                                          | Armet       | gb:AK014338.1  | 2             | 52.8    |
| WW domain binding protein 1                                                           | WBP1        | gb:NM_016757.1 | 2             | 6.7     |
| <b>Protein folding/Secretory pathway</b>                                              |             |                |               |         |
| protein disulfide isomerase-related protein                                           | ERp72       | gb:J05186.1    | 6.3           | 19.4    |
| Stromal cell derived factor 2-like 1                                                  | Sdf2l1      | gb:NM_022324.1 | 4             | 9.7     |
| homocysteine-inducible, endoplasmic reticulum stress-inducible, ubiquitin-like domain | Herpud1     | gb:NM_022331.1 | 2.8           | 10.7    |
| DnaJ homolog, subfamily B, member 11                                                  | Dnajb11     | gb:AK010861.1  | 2.7           | 7.1     |
| DnaJ (Hsp40) homolog, subfamily C, member 3                                           | Dnajc3      | gb:AU023889    | 2.4           | 9.4     |
| tumor rejection antigen gp96                                                          | Tra1        | gb:BE995678    | 2.3           | 90.7    |
| Calcium binding protein 140 kDa                                                       | Cab140      | gb:BM231738    | 2.3           | 5       |
| HRD1 homolog                                                                          |             | gi:12836041    | 2             | 1.5     |
| DNA-damage inducible transcript 3, C/EBP homologous protein (CHOP)                    | Ddit3       | gi:6681150     | 2             | 5.2     |
| BiP                                                                                   | Hspa5       | gb:NM_022310.1 | 1.9           | 102     |
| calreticulin                                                                          | Calr        | gb:AW324084    | 1.8           | 70      |
| Similar to HSPC160 protein                                                            |             | gb:BC002146.1  | 1.8           | 8.7     |
| ER alpha-mannosidase like                                                             | EDEM        | gb:BG064496    | 1.6           | 6.1     |
| <b>Other functions</b>                                                                |             |                |               |         |
| casein kappa                                                                          | Csnk        | gb:NM_007786.1 | 5.2           | 2.3     |
| CD68 antigen                                                                          | Cd68        | gb:BC021637.1  | 3.2           | 1.9     |
| cell growth regulator with EF hand domain 1                                           | Cgrefl      | gb:BC023116.1  | 2.8           | 1.4     |
| Carbonic anhydrase 3, muscle specific                                                 | Car3        | gb:AK003671.1  | 2.4           | 4.3     |
| fatty acyl-CoA reductase                                                              |             | gb:BG094874    | 2.3           | 10.8    |
| related to male sterility protein 2-like protein                                      |             | gb:AK011187.1  | 2.3           | 3.6     |
| laminin B1 subunit 1                                                                  | Lamb1-1     | gb:BG868949    | 2.3           | 1.9     |
| homeo box A1                                                                          | Hoxa1       | gb:NM_010449.1 | 2.2           | 1.1     |
| Weakly similar to tyrosine-protein kinase jak3                                        |             | gb:BI150812    | 2.2           | 2       |
| myo-inositol 1-phosphate synthase A1                                                  |             | gb:NM_023627.1 | 2.1           | 4.3     |
| solute carrier family 20, member 1                                                    | Slc20a1     | gi:7657578     | 2             | 22.2    |
| DNA-damage inducible transcript 3, C/EBP homologous protein (CHOP)                    | Ddit3       | gi:6681150     | 2             | 5.2     |
| phenylalkylamine Ca <sup>2+</sup> antagonist (emopamil)binding protein                | Ebp         | gi:6681254     | 1.9           | 14.1    |
| lysosomal acid lipase 1                                                               | Lip1        | gi:4605285     | 1.9           | 3.5     |
| serine proteinase inhibitor, clade B, member 9g                                       | Serpin9g    | gi:18251227    | 1.9           | 1.2     |
| insulin-like growth factor binding protein 6                                          | Igfbp6      | gi:6680386     | 1.8           | 34.7    |
| tubulin, beta 3                                                                       | Tubb3       | gi:12963614    | 1.8           | 5.5     |
| ADP-ribosylation factor 2                                                             | Arf2        | gi:6671570     | 1.8           | 5       |
| CDK2-associated protein 2                                                             | Cdk2ap2     | gi:13385869    | 1.7           | 28.8    |
| actinin alpha 3                                                                       | Actn3       | gi:7304854     | 1.7           | 4.3     |
| fibroblast inducible secreted protein (connective tissue growth factor, IGFBP8)       | Ctgf        | gi:6753877     | 1.7           | 7.6     |
| tectonic family member 2                                                              |             | gi:12849656    | 1.7           | 1       |
| CDCREL-1 homolog (Septin 5)                                                           | Cdrel-1     | gi:3986408     | 1.6           | 2.3     |
| Highly similar to guanine nucleotide exchange factor                                  |             | gi:16392522    | 1.6           | 1.1     |
| prolyl 4-hydroxylase                                                                  | P4hb        | gi:17867783    | 1.5           | 71      |
