# Supplementary material
Source: PubMed Central journal article supplement (PMC3186435)
Supplement: supp_M111.233502_jbc.M111.233502-2.pdf [file supp_M111.233502_jbc.M111.233502-2.pdf]

|       |     |                                                                    |            |    |
|-------|-----|--------------------------------------------------------------------|------------|----|
| Human |     | 1                                                                  | MGEPAGVAGT | 10 |
| Mouse |     |                                                                    | -----      |    |
| Human | 11  | MESPFSPGLFHRLEDEDWDSALFAELGYFTDDELQLEAANETYENNFNLDLDFDLDPWE        | 70         |    |
|       |     | MESPFSP L H DEDW+S LFAELGYFTD++ +AA+E YENNF+L+FDL+PWE              |            |    |
| Mouse | 1   | MESPFSPVLPHPDEDEDWESTLFAELGYFTD+D+VHFDAAHEAYENNFHDLNFDLDPWE        | 60         |    |
| Human | 71  | SDIWDINNQICTVKDIKAEPQPLSPASSYSVSSPRSVDSYSSTQHVPEELDLSSSSQMS        | 130        |    |
|       |     | SD+W + C+ D+KAEPQPLSPASS S+SSPRS DS SSTQHVPEELDL SSSQ              |            |    |
| Mouse | 61  | SDLWSPGSHFCS--DMKAEPQPLSPASSSCSISSPRSTDSCSSTQHVPEELDLSSSSQSP       | 118        |    |
| Human | 131 | PLSLYGENSNLSLSSPEPLKEDKPVTSRNTENGLTPKKKIQVNSKPSIQPKPLLLPAAP        | 190        |    |
|       |     | LSLYG++ NS SS EPLKE+KP+TG NKTE+GLTPKKKIQ++SKPS+QPKPLLLPAAP         |            |    |
| Mouse | 119 | -LSLYGDCNSPSSVEPLKEEKPIITGPGNKTEHGLTPKKKIQMSSKPSVQPKPLLLPAAP       | 177        |    |
| Human | 191 | KTQTNSSVPAKTI I I QTVPTLMPLAKQQPI I ISLQPAPTKGQTVLLSQPTVVQLQAPGVLP | 250        |    |
|       |     | KTQTN+SVPK I I I Q+P LMPLAKQQ I IS+QPAPTKGQTVLLSQPTVVQLQ+P VLP     |            |    |
| Mouse | 178 | KTQTNASVPAKAI I I QTLPALMPLAKQSI I SIQPAPTKGQTVLLSQPTVVQLQSPAVLP   | 237        |    |
| Human | 251 | SAQPVLAVAGGVTLQPNHVNVVPAPSANSFPVNGKLSVTKPVLQSTMRNVGSDIAVLRRO       | 310        |    |
|       |     | SAQPVLAV GG QLPNHVVNV+PAP +SPVNGKLSVTKPVLQS R++GSDIAVLRRO          |            |    |
| Mouse | 238 | SAQPVLAVTGGAQLPNHVNVLPAPVSSPVNGKLSVTKPVLQSATRSMGSDIAVLRRO          | 297        |    |
| Human | 311 | QRMIKNRESACQSRKKKKEYMLGLEARLKAALSENEQLKKENGLKQRLDEVVSENQRLK        | 370        |    |
|       |     | QRMIKNRESACQSRKKKKEYMLGLEARLKAALSENEQLKKENG+LKRQRLDEVVSENQRLK      |            |    |
| Mouse | 298 | QRMIKNRESACQSRKKKKEYMLGLEARLKAALSENEQLKKENGLKQRLDEVVSENQRLK        | 357        |    |
| Human | 371 | VSPKRRVVCVMIVLAFI I LNYGPMMLQDSRRMNPSVGPANQRRHLLGFSAKEAQTDS        | 430        |    |
|       |     | VSPKRR VCVMIIVLAFI+LNYGPMMLQ+SRR+ PSV PANQRRHLL FSAKE +DTS         |            |    |
| Mouse | 358 | VSPKRRVVCVMIVLAFI I LNYGPMMLQESRRVVKPSVSPANQRRHLLGFSAKEVKTDS       | 417        |    |
| Human | 431 | DGIIQKNSYRYDHSVSNKALMVLTEEPALLYIPPPCQPLINTTESLRLNHELGRGWVHRH       | 490        |    |
|       |     | DG QK+SY YDHSVSNKALMVL+EEPLY+PPPCQPLINTTESLRLNHELGRGWVHRH          |            |    |
| Mouse | 418 | DGDNQKDSYSDHSVSNKALMVLSEEPALLYMPPPCQPLINTTESLRLNHELGRGWVHRH        | 477        |    |
| Human | 491 | EVERTKSRRTNNQKTRILQGVVEQGSNSQLMAVQYTETTSISRNSGSELQVYYASPR          | 550        |    |
|       |     | EVERTKSRRTN+QK RILQG +EQGSNSQLMAVQYTETT ISRNSGSELQVYYASP           |            |    |
| Mouse | 478 | EVERTKSRRTNSQKARILQGALEQGSNSQLMAVQYTETT-SISRNSGSELQVYYASPG         | 536        |    |
| Human | 551 | SYQDFFEAIRRRGDTFYVVSFRRDHLLLPATTHNKTRPKMSIVLPAININENVINGQDY        | 610        |    |
|       |     | SYQ FF+AIRRRGDTFYVVSFRRDHLLLPATTHNKTRPKMSIVLPAININ+NVINGQDY        |            |    |
| Mouse | 537 | SYQGFFDAIRRRGDTFYVVSFRRDHLLLPATTHNKTRPKMSIVLPAININDNVINGQDY        | 596        |    |
| Human | 611 | EVMQIDCQVMDTRILHIKSSSVPPYLDRDQRNQTNTFFGSPPAATEATHVVSTIPESLQ        | 670        |    |
|       |     | EVMQIDCQVMDTRILHIKSSSVPPYLDR QRNQT+TFFGSPP TE THVVSTIPESLQ         |            |    |
| Mouse | 597 | EVMQIDCQVMDTRILHIKSSSVPPYLDRDQRNQTSTFFGSPPTTTETHVVSTIPESLQ         | 656        |    |

Supplemental Figure 1. Alignment of human ATF6 and mouse ATF6 proteins by BLAST. Identical amino acid residues between the two sequences are shown between them. Asterisks indicate the amino acid residues at the domain boundaries. Ile171 and Ser373 in human ATF6 correspond to Ile158 and Ser360 in mouse ATF6, respectively.
